# Supplementary material for: Bupivacaine suppresses the progression of gastric cancer through regulating circ_0000376/miR-145-5p axis
Source: PubMed Central journal article supplement (PMC7597012; doi:10.1186/s12871-020-01179-4), 2020-10-30

Fig 2C  
AGS

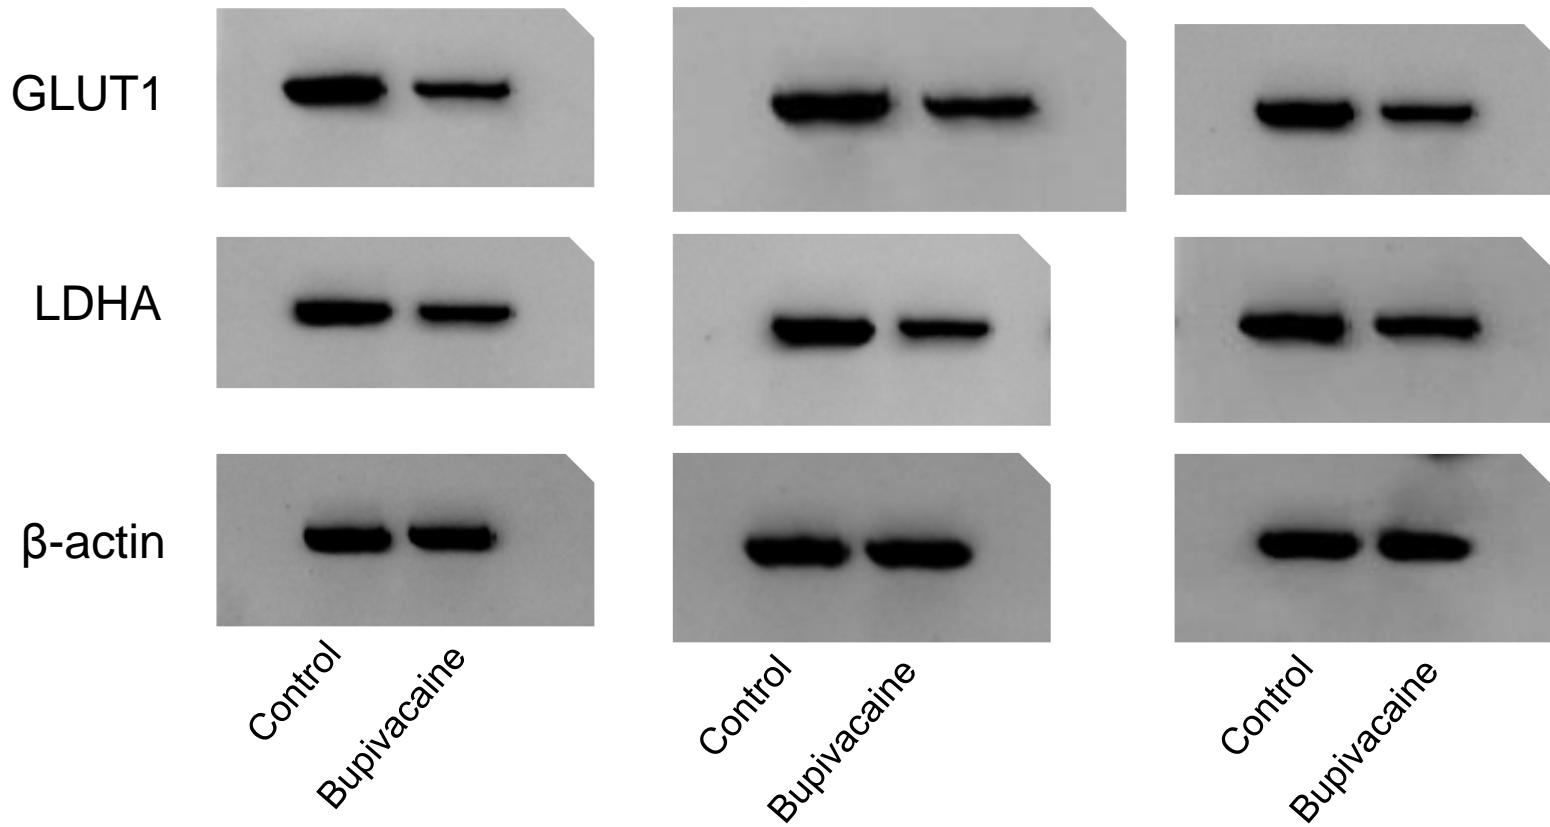

Fig 2C  
HGC27

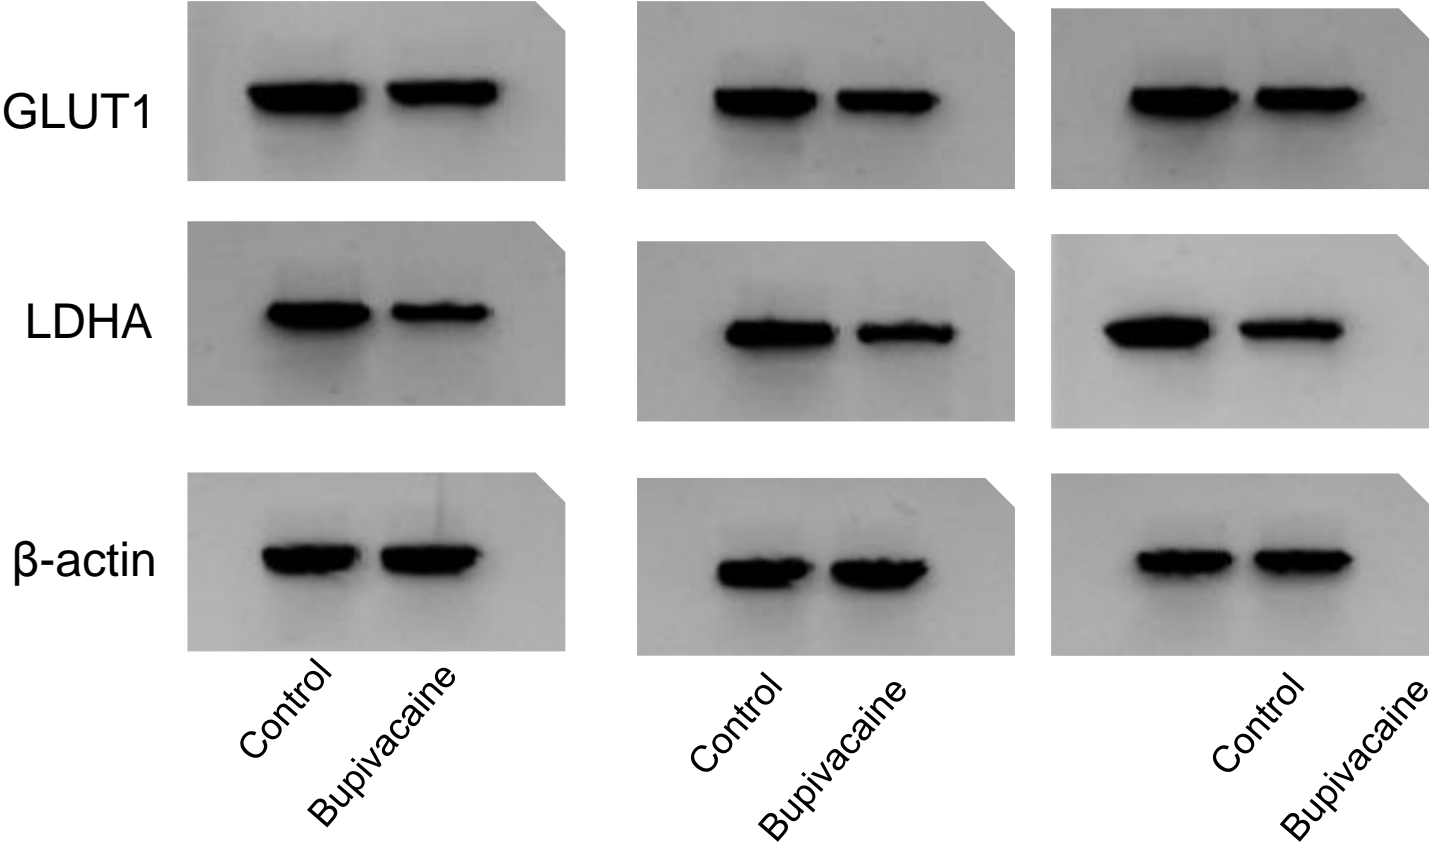

Fig 4J  
AGS

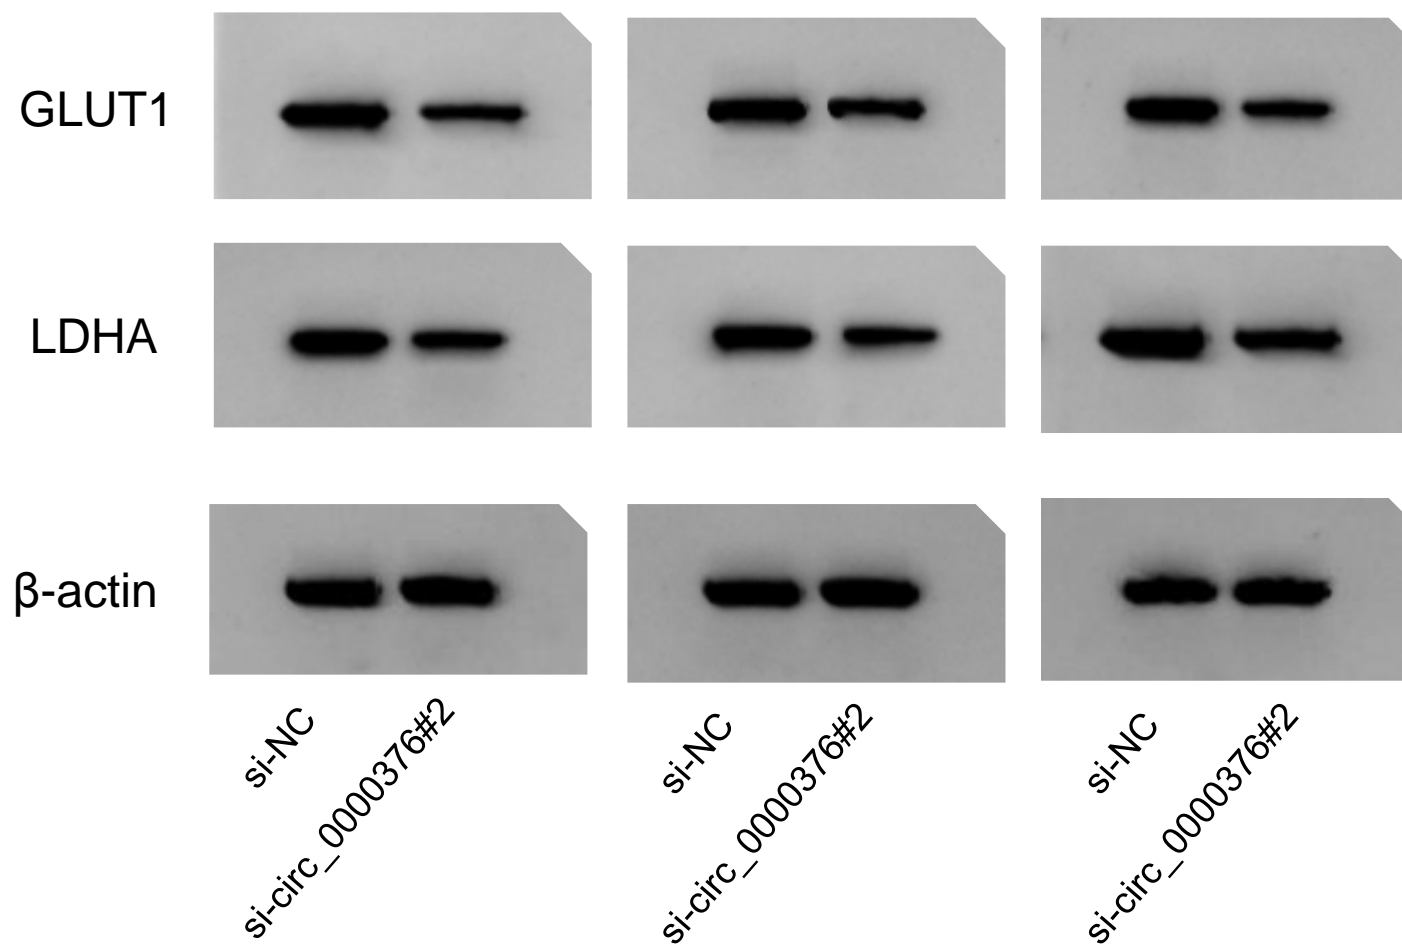

Fig 4J  
HGC27

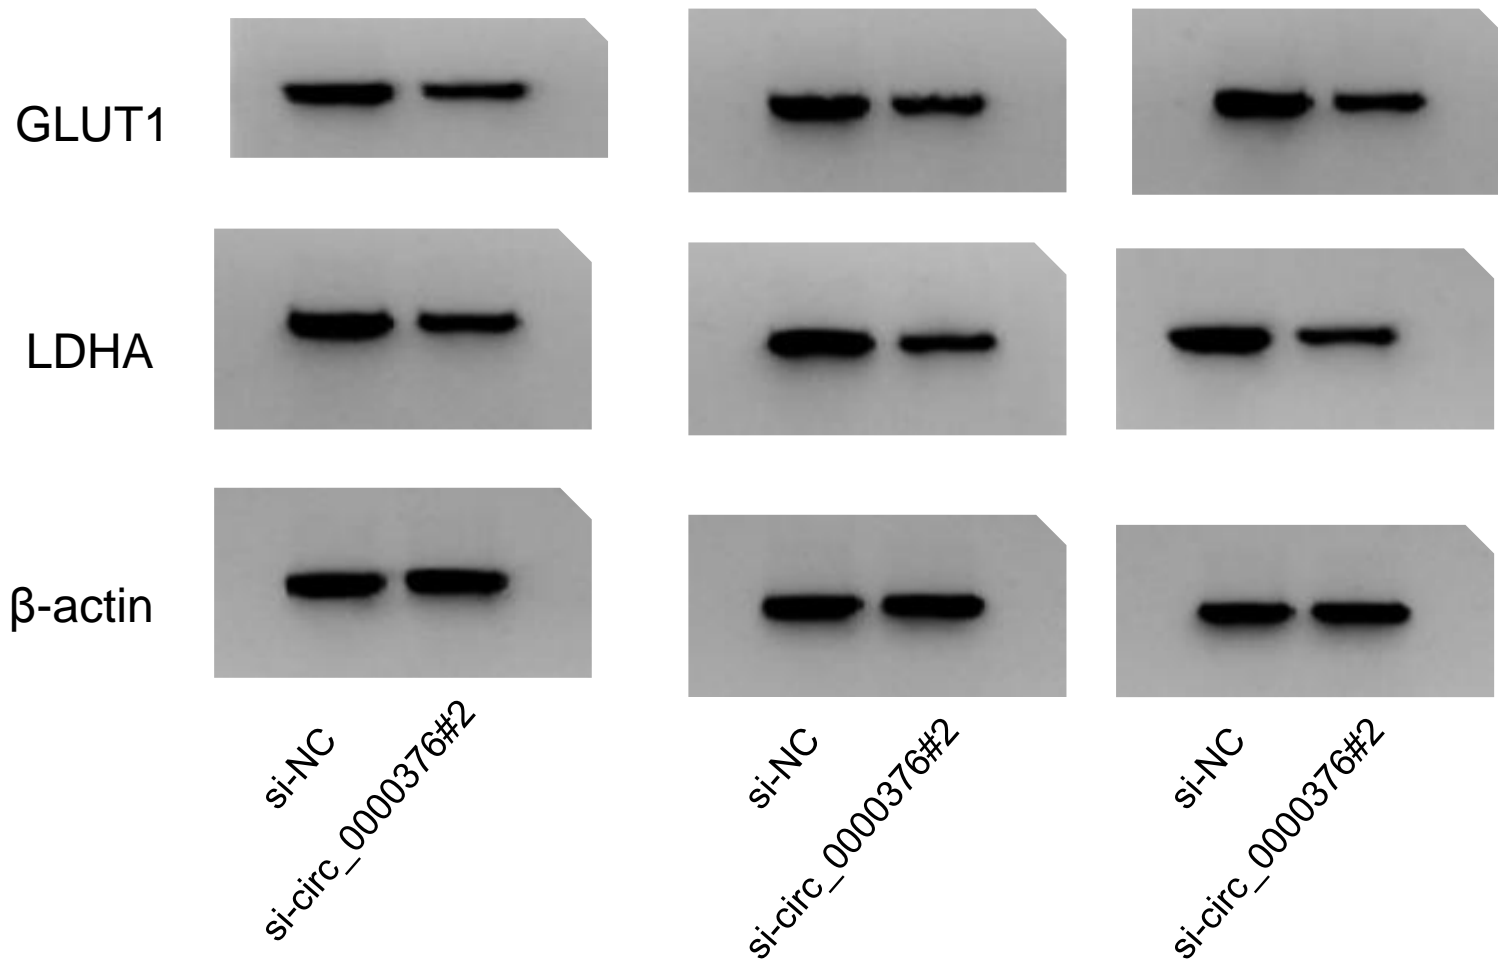

Fig 6J  
AGS

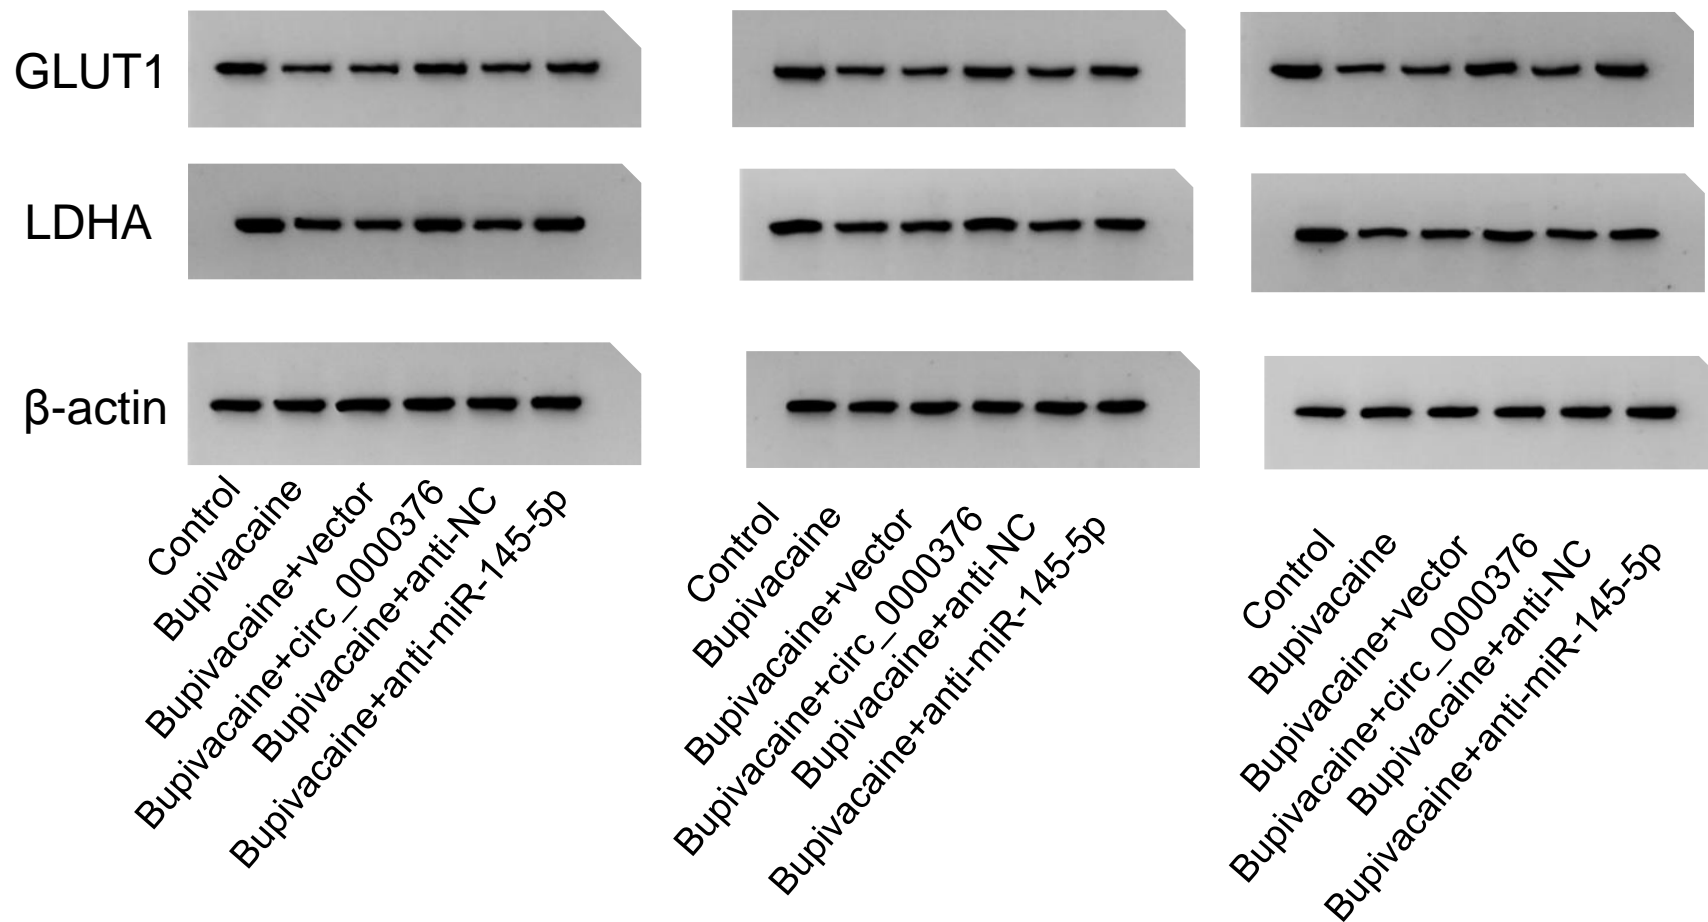

Fig 6J  
HGC27

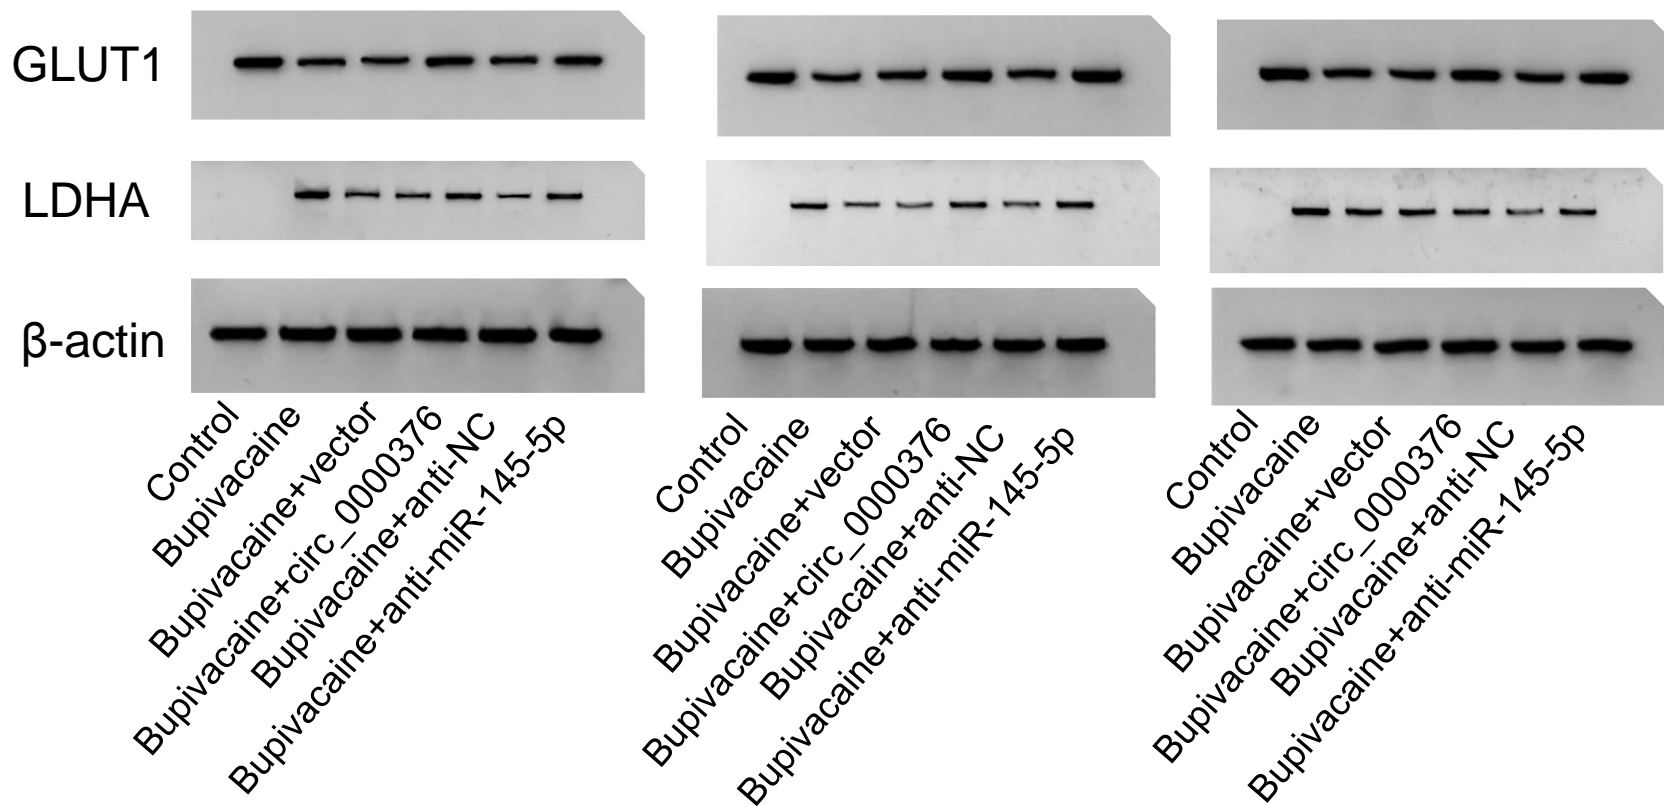

Supplement: 12871_2020_1179_MOESM2_ESM.pdf [file 12871_2020_1179_MOESM2_ESM.pdf]
